# Supplementary material for: In situ Generated 212Pb-PSMA Ligand in a 224Ra-Solution for Dual Targeting of Prostate Cancer Sclerotic Stroma and PSMA-Positive Cells
Source: PubMed Central journal article supplement — Curr Radiopharm. 2020 Aug;13(2):130–41. doi: 10.2174/1874471013666200511000532 (PMC7527546; doi:10.2174/1874471013666200511000532), 2020-08
Supplement: CRP-13-130_SD1.pdf [file CRP-13-130_SD1.pdf]

## Supplementary Material

### *In situ* Generated $^{212}\text{Pb}$ -PSMA Ligand in a $^{224}\text{Ra}$ -Solution for Dual Targeting of Prostate Cancer Sclerotic Stroma and PSMA-positive Cells

Vilde Yuli Stenberg<sup>1,2,3</sup>, Asta Juzeniene<sup>1,\*</sup>, Øyvind Sverre Bruland<sup>3,4</sup> and Roy Hartvig Larsen<sup>2</sup>

<sup>1</sup>Department of Radiation Biology, Institute for Cancer Research, Norwegian Radium Hospital, Oslo University Hospital, Oslo, Norway; <sup>2</sup>Nucligen AS, Oslo, Norway; <sup>3</sup>Institute for Clinical Medicine, University of Oslo, Oslo, Norway; <sup>4</sup>Department of Oncology, Norwegian Radium Hospital, Oslo University Hospital, Oslo, Norway

#### METHODS

Supplementary Table S1. Energy of alphas, betas, X rays and gammas of radionuclides in the  $^{224}\text{Ra}$ -series.<sup>1,2</sup>

| Radionuclide (Half-Life)                             | Alphas and Betas, Mean Energy                                                   | X Rays and Gammas, Energy and % Abundance                                                                                                                                    |
|------------------------------------------------------|---------------------------------------------------------------------------------|------------------------------------------------------------------------------------------------------------------------------------------------------------------------------|
| $^{228}\text{Th}$ (1.91 years)                       | $\alpha$ , 5.4 MeV                                                              | 84 keV, 1.2%                                                                                                                                                                 |
| $^{224}\text{Ra}$ (3.66 d)                           | $\alpha$ , 5.6 MeV                                                              | 241 keV, 4.1%                                                                                                                                                                |
| $^{220}\text{Rn}$ (55.60 s)                          | $\alpha$ , 6.3 MeV                                                              |                                                                                                                                                                              |
| $^{216}\text{Po}$ (0.15 s)                           | $\alpha$ , 6.8 MeV                                                              |                                                                                                                                                                              |
| $^{212}\text{Pb}$ (10.64 h)                          | $\beta$ , 0.1 MeV                                                               | 75 keV, 10.3%<br>77 keV, 17.1%<br>87 keV, 6.0%<br>90 keV, 1.5%<br>239 keV, 43.6%<br>300 keV, 3.3%                                                                            |
| $^{212}\text{Bi}$ (60.55 min)                        | $\alpha$ , 6.1 MeV (2.2 MeV effective)<br>$\beta$ , 0.7 MeV (0.4 MeV effective) | 727 keV, 6.7% (4.3% effective)                                                                                                                                               |
| $^{212}\text{Po}$ (0.30 $\mu\text{s}$ ) <sup>1</sup> | $\alpha$ , 8.8 MeV (5.6 MeV effective)                                          |                                                                                                                                                                              |
| $^{208}\text{Tl}$ (3.05 min) <sup>2</sup>            | $\beta$ , 0.6 MeV (0.2 MeV effective)                                           | 75 keV, 3.4% (1.2% effective)<br>511 keV, 22.6% (8.1% effective)<br>583 keV, 85.0% (30.6% effective)<br>860 keV, 12.5% (4.5% effective)<br>2615 keV, 99.8% (35.9% effective) |

<sup>1</sup>64% branching.

<sup>2</sup>36% branching.

**SUPPLEMENTARY RESULTS**

**Supplementary Table S2. Radiochemical purity (RCP) values of  $^{212}\text{Pb}$  and  $^{212}\text{Bi}$  after radiolabelling of different concentrations of NG001 or PSMA-617 in the solution of  $^{224}\text{Ra}$  in equilibrium with progeny. N, the number of independent experiments.**

| Ligand Concentration ( $\mu\text{g/ml}$ ) | Specific Activity (MBq/mg) | RCP (%)           |   |                   |   |
|-------------------------------------------|----------------------------|-------------------|---|-------------------|---|
|                                           |                            | $^{212}\text{Pb}$ | N | $^{212}\text{Bi}$ | N |
| 0                                         | 0                          | 1.33 $\pm$ 0.06   | 3 |                   |   |
| NG001                                     |                            |                   |   |                   |   |
| 2.5                                       | 720-907                    | 16.32 $\pm$ 4.24  | 2 |                   |   |
| 5                                         | 350-533                    | 51.85 $\pm$ 12.02 | 3 |                   |   |
| 10                                        | 10-207                     | 90.75 $\pm$ 4.66  | 4 | 45.69 $\pm$ 0.78  | 2 |
| 12.5                                      | 500-1130                   | 91.31 $\pm$ 1.61  | 2 |                   |   |
| 15                                        | 127-178                    | 94.50 $\pm$ 0.42  | 2 |                   |   |
| 33                                        | 99-180                     | 94.04 $\pm$ 0.87  | 7 |                   |   |
| 45                                        | 43-59                      | 95.04 $\pm$ 1.45  | 2 |                   |   |
| 50                                        | 16-338                     | 95.59 $\pm$ 0.68  | 5 | 66.01 $\pm$ 12.27 | 2 |
| 60                                        | 79-84                      | 94.36 $\pm$ 2.21  | 2 |                   |   |
| 80                                        | 94-104                     | 94.20 $\pm$ 0.21  | 2 |                   |   |
| 150                                       | 6-14                       | 96.69 $\pm$ 0.45  | 2 | 79.44 $\pm$ 8.96  | 2 |
| 500                                       | 2-4                        | 96.22 $\pm$ 0.27  | 2 | 75.25 $\pm$ 9.09  | 2 |
| PSMA-617                                  |                            |                   |   |                   |   |
| 20-35                                     | 105-200                    | 93.96 $\pm$ 2.73  | 4 |                   |   |
| 45                                        | 145-200                    | 96.25 $\pm$ 2.98  | 2 |                   |   |
| 50-60                                     | 90-105                     | 96.53 $\pm$ 1.88  | 2 |                   |   |
| 80-90                                     | 30-45                      | 95.20 $\pm$ 1.00  | 3 |                   |   |

**Supplementary Table S3. Radiochemical purity (RCP) values of  $^{212}\text{Bi}$ -labelled NG001 in the  $^{224}\text{Ra}$ -solution after different time points up to 48 h. N, the number of independent experiments.**

| Incubation Time | RCP (%)           |   |
|-----------------|-------------------|---|
|                 | $^{212}\text{Bi}$ | N |
| 1 h             | 58.20 $\pm$ 3.50  | 3 |
| 24 h            | 64.99 $\pm$ 1.98  | 2 |
| 48 h            | 68.85 $\pm$ 7.18  | 2 |

**Supplementary Table S4. Radiochemical purity (RCP) (top) and cell binding fraction (bottom) of  $^{212}\text{Pb}$ -labelled NG001 in a solution of radium-224 added no scavenger, 2% L-ascorbic acid, 2% HSA or the two scavengers in combination, after different time points up to 48h, n=2-3 independent experiments.**

| Incubation Time | RCP (%)                   |                    |            |                               |
|-----------------|---------------------------|--------------------|------------|-------------------------------|
|                 | No Scavenger              | 2% L-Ascorbic acid | 2% HSA     | 2% L-Ascorbic Acid and 2% HSA |
| 0.5 h           | 93.53±1.61                | 92.70±0.75         | 92.79±1.55 | 92.65±1.17                    |
| 1 h             | 94.04±1.23                | 92.16±1.23         | 92.56±0.89 | 93.06±0.61                    |
| 24 h            | 93.46±0.67                | 92.67±0.85         | 91.63±1.16 | 94.16±0.04                    |
| 48 h            | 92.52±1.39                | 92.84±1.09         | 89.75±2.12 | 92.44±1.83                    |
| Incubation time | Cell binding fraction (%) |                    |            |                               |
|                 | No scavenger              | 2% L-Ascorbic acid | 2% HSA     | 2% L-Ascorbic acid and 2% HSA |
| 0.5 h           | 61.50±4.50                | 58.84±0.59         | 61.54±4.99 | 62.40±4.62                    |
| 1 h             | 57.62±4.59                | 58.03±2.91         | 59.51±4.19 | 61.82±3.78                    |
| 24 h            | 45.92±5.46                | 48.01±1.28         | 47.31±0.28 | 61.14±1.77                    |
| 48 h            | 40.12±5.31                | 46.69±1.05         | 40.44±6.08 | 56.00±10.24                   |

**Supplementary Table S5. Percentage of injected activity per gram of tissue (%ID/g) ± SD of  $^{212}\text{Pb}$ ]Pb]PbCl<sub>2</sub>,  $^{212}\text{Pb}$ ]Pb]Pb-NG001 and  $^{212}\text{Pb}$ ]Pb]Pb-PSMA-617 at 2 h after intravenously injection of  $^{224}\text{Ra}$ & $^{212}\text{Pb}$  (A),  $^{224}\text{Ra}$ & $^{212}\text{Pb}$ -NG001 (B) and  $^{224}\text{Ra}$ & $^{212}\text{Pb}$ -PSMA-617 (C) in athymic mice bearing human prostate C4-2 cancer xenografts, n=3-5 mice. The ingrowth of the carrier-free  $^{212}\text{Pb}$  from  $^{224}\text{Ra}$  was calculated and subtracted from the measured counts per minute (CPM) values in tissues and standards before %ID/g values were calculated (upper values). %ID/g values for ingrowth of the carrier-free  $^{212}\text{Pb}$  from  $^{224}\text{Ra}$  were calculated (lower values). BLOQ, below level of quantification; NA, not available.**

| Organ          | %ID/g of $^{212}\text{Pb}$<br>without $^{212}\text{Pb}$ Ingrowth from $^{224}\text{Ra}$<br>( $^{212}\text{Pb}$ Ingrowth from $^{224}\text{Ra}$ ) |                             |                              | P-value          |                  |                  |
|----------------|--------------------------------------------------------------------------------------------------------------------------------------------------|-----------------------------|------------------------------|------------------|------------------|------------------|
|                | A                                                                                                                                                | B                           | C                            | A vs B           | A vs C           | B vs C           |
| Blood          | 4.47±0.89<br>(0.03±0.00)                                                                                                                         | 1.34±0.96<br>(0.04±0.01)    | 1.37±0.40<br>(0.05±0.00)     | 0.002<br>(>0.05) | 0.005<br>(>0.05) | >0.05<br>(>0.05) |
| Urine          | 21.42±14.08<br>(3.15±2.99)                                                                                                                       | 117.08±71.55<br>(3.97±1.66) | 247.30±106.95<br>(5.86±1.90) | >0.05<br>(>0.05) | 0.014<br>(>0.05) | >0.05<br>(>0.05) |
| Testes         | 0.41±0.07<br>(0.02±0.01)                                                                                                                         | 0.73±0.65<br>(0.04±0.02)    | 0.72±0.24<br>(0.04±0.01)     | >0.05<br>(>0.05) | >0.05<br>(>0.05) | >0.05<br>(>0.05) |
| Prostate       | 1.04±0.36<br>(0.09±0.03)                                                                                                                         | 1.64±1.66<br>(0.10±0.03)    | 2.49±1.39<br>(0.12±0.01)     | >0.05<br>(>0.05) | >0.05<br>(>0.05) | >0.05<br>(>0.05) |
| Salivary gland | BLOQ<br>(1.61±0.47)                                                                                                                              | BLOQ<br>(1.67±0.50)         | BLOQ<br>(2.15±0.48)          | NA<br>(>0.05)    | NA<br>(>0.05)    | NA<br>(>0.05)    |
| Tumour         | 1.71±1.29<br>(0.07±0.03)                                                                                                                         | 15.01±4.73<br>(0.09±0.02)   | 18.71±4.78<br>(0.19±0.11)    | 0.006<br>(>0.05) | 0.003<br>(>0.05) | >0.05<br>(>0.05) |
| Skin           | 0.62±0.00<br>(0.08±0.01)                                                                                                                         | 0.54±0.19<br>(0.10±0.01)    | 0.49±0.20<br>(0.14±0.02)     | >0.05<br>(>0.05) | >0.05<br>(>0.05) | >0.05<br>(>0.05) |

|                 |                           |                           |                            |                   |                   |                  |
|-----------------|---------------------------|---------------------------|----------------------------|-------------------|-------------------|------------------|
| Kidneys         | 48.47±7.57<br>(1.20±0.06) | 21.39±9.55<br>(1.77±0.28) | 74.17±25.59<br>(2.34±0.10) | >0.05<br>(0.014)  | >0.05<br>(<0.001) | 0.002<br>(0.014) |
| Liver           | 8.54±1.54<br>(0.04±0.01)  | 3.03±1.66<br>(0.05±0.01)  | 1.80±0.29<br>(0.06±0.01)   | 0.002<br>(>0.05)  | 0.001<br>(>0.05)  | >0.05<br>(>0.05) |
| Spleen          | 0.99±0.48<br>(1.29±0.46)  | BLOQ<br>(1.62±0.33)       | BLOQ<br>(2.12±0.60)        | NA<br>(>0.05)     | NA<br>(>0.05)     | NA<br>(>0.05)    |
| Small intestine | 2.99±0.47<br>(0.08±0.02)  | 0.63±0.46<br>(0.18±0.14)  | 0.56±0.26<br>(0.15±0.10)   | <0.001<br>(>0.05) | <0.001<br>(>0.05) | >0.05<br>(>0.05) |
| Large intestine | 2.05±0.30<br>(0.62±0.30)  | 0.33±0.47<br>(0.73±0.38)  | 0.30±0.18<br>(0.65±0.09)   | <0.001<br>(>0.05) | 0.001<br>(>0.05)  | >0.05<br>(>0.05) |
| Stomach         | 0.39±0.11<br>(0.09±0.02)  | 0.18±0.12<br>(0.11±0.01)  | 0.19±0.19<br>(0.14±0.02)   | >0.05<br>(>0.05)  | >0.05<br>(>0.05)  | >0.05<br>(>0.05) |
| Lungs           | 3.28±0.20<br>(0.12±0.01)  | 1.36±0.59<br>(0.15±0.03)  | 1.03±0.64<br>(0.18±0.09)   | 0.003<br>(>0.05)  | 0.002<br>(>0.05)  | >0.05<br>(>0.05) |
| Heart           | 0.98±0.30<br>(0.04±0.00)  | 0.38±0.24<br>(0.04±0.01)  | 0.77±0.30<br>(0.09±0.08)   | 0.037<br>(>0.05)  | >0.05<br>(>0.05)  | >0.05<br>(>0.05) |
| Bladder         | 1.73±0.10<br>(0.07±0.02)  | 4.62±2.65<br>(0.19±0.12)  | 5.45±2.52<br>(0.15±0.10)   | >0.05<br>(>0.05)  | >0.05<br>(>0.05)  | >0.05<br>(>0.05) |
| Femur           | 7.66±0.27<br>(2.24±0.23)  | 1.32±1.27<br>(2.71±0.47)  | BLOQ<br>(3.14±0.12)        | >0.05<br>(>0.05)  | NA<br>(>0.05)     | NA<br>(>0.05)    |
| Muscle          | 0.17±0.02<br>(0.03±0.00)  | 0.14±0.02<br>(0.04±0.01)  | 0.12±0.02<br>(0.06±0.01)   | >0.05<br>(>0.05)  | >0.05<br>(>0.05)  | >0.05<br>(>0.05) |
| Brain           | 0.20±0.03<br>(0.01±0.01)  | 0.13±0.05<br>(0.02±0.01)  | 0.13±0.07<br>(0.10±0.14)   | >0.05<br>(>0.05)  | >0.05<br>(>0.05)  | >0.05<br>(>0.05) |
| Skull           | 7.30±0.96<br>(2.26±0.15)  | 0.81±0.78<br>(2.52±0.61)  | BLOQ<br>(2.70±0.33)        | <0.001<br>(>0.05) | NA<br>(>0.05)     | NA<br>(>0.05)    |

**Supplementary Table S6. Percentage of injected activity per gram of tissue (%ID/g) ± SD of <sup>224</sup>Ra at 2 h after intravenously injection of <sup>224</sup>Ra&<sup>212</sup>Pb (A), <sup>224</sup>Ra&<sup>212</sup>Pb-NG001 (B) and <sup>224</sup>Ra&<sup>212</sup>Pb-PSMA-617 (C) in athymic mice bearing human prostate C4-2 cancer xenografts, n=3-5 mice.**

| Organ          | <sup>224</sup> Ra %ID/g |             |             | P-value |        |        |
|----------------|-------------------------|-------------|-------------|---------|--------|--------|
|                | A                       | B           | C           | A vs B  | A vs C | B vs C |
| Blood          | 0.30±0.03               | 0.31±0.08   | 0.43±0.01   | >0.05   | 0.043  | 0.036  |
| Urine          | 40.97±15.08             | 27.30±11.05 | 47.74±15.47 | >0.05   | >0.05  | >0.05  |
| Testes         | 0.21±0.05               | 0.31±0.14   | 0.30±0.05   | >0.05   | >0.05  | >0.05  |
| Prostate       | 0.81±0.26               | 0.74±0.28   | 0.98±0.11   | >0.05   | >0.05  | >0.05  |
| Salivary gland | 14.00±4.08              | 11.60±3.34  | 17.54±4.03  | >0.05   | 0.152  | >0.05  |
| Tumour         | 0.72±0.13               | 0.69±0.26   | 1.17±0.19   | >0.05   | >0.05  | 0.043  |
| Skin           | 0.66±0.09               | 0.67±0.11   | 1.11±0.19   | >0.05   | 0.009  | 0.005  |

|                 |            |            |            |       |       |       |
|-----------------|------------|------------|------------|-------|-------|-------|
| Kidneys         | 10.41±0.47 | 12.42±2.94 | 19.10±0.85 | >0.05 | >0.05 | 0.007 |
| Liver           | 0.33±0.06  | 0.32±0.06  | 0.53±0.06  | >0.05 | 0.007 | 0.003 |
| Spleen          | 11.23±4.01 | 11.15±1.46 | 17.30±5.02 | >0.05 | 0.077 | >0.05 |
| Small intestine | 0.68±0.15  | 1.27±1.08  | 1.23±0.80  | >0.05 | >0.05 | >0.05 |
| Large intestine | 5.42±2.61  | 5.24±2.94  | 5.34±0.78  | >0.05 | >0.05 | >0.05 |
| Stomach         | 0.80±0.20  | 0.76±0.12  | 1.16±0.18  | >0.05 | >0.05 | 0.023 |
| Lungs           | 1.07±0.08  | 1.09±0.28  | 1.43±0.76  | >0.05 | >0.05 | >0.05 |
| Heart           | 0.32±0.01  | 0.31±0.10  | 0.74±0.66  | >0.05 | >0.05 | >0.05 |
| Bladder         | 0.65±0.13  | 1.28±0.76  | 1.26±0.79  | >0.05 | >0.05 | >0.05 |
| Femur           | 19.40±1.97 | 18.90±3.74 | 25.57±0.81 | >0.05 | >0.05 | >0.05 |
| Muscle          | 0.23±0.01  | 0.27±0.09  | 0.45±0.07  | >0.05 | >0.05 | >0.05 |
| Brain           | 0.11±0.05  | 0.12±0.07  | 0.81±1.14  | >0.05 | >0.05 | 0.437 |
| Skull           | 19.62±1.28 | 17.85±5.45 | 21.98±2.73 | >0.05 | >0.05 | >0.05 |

## REFERENCES

1. Larsen, R.H. Radiopharmaceutical solutions with advantageous properties. US 2018/0028696 A1 (Sciencons AS, 2018).
2. Westrom, S., Generalov, R., Bonsdorff, T.B. & Larsen, R.H. Preparation of (212)Pb-labeled monoclonal antibody using a novel (224)Ra-based generator solution. *Nucl Med Biol* **51**, 1-9 (2017).
